# Supplementary material for: Standardization of the liquid biopsy for pediatric diffuse midline glioma using ddPCR
Source: PubMed Central journal article supplement (PMC7930089; doi:10.1038/s41598-021-84513-1), 2021-03-03
Supplement: 41598_2021_84513_MOESM1_ESM.pdf [file 41598_2021_84513_MOESM1_ESM.pdf]

## **Standardization of the liquid biopsy for pediatric diffuse midline glioma using ddPCR**

Daphne Li MD, Erin R Bonner BA, Kyle Wierzbicki BS, Eshini Panditharatna PhD, Tina Huang MS, Rishi Lulla MD, Sabine Mueller MD, Carl Koschmann MD, Javad Nazarian PhD, Amanda M Saratsis MD

### **SUPPLEMENTARY MATERIAL**

Supplemental Figures: 6

Supplemental Tables: 2

**SUPPLEMENTARY FIGURE 1**

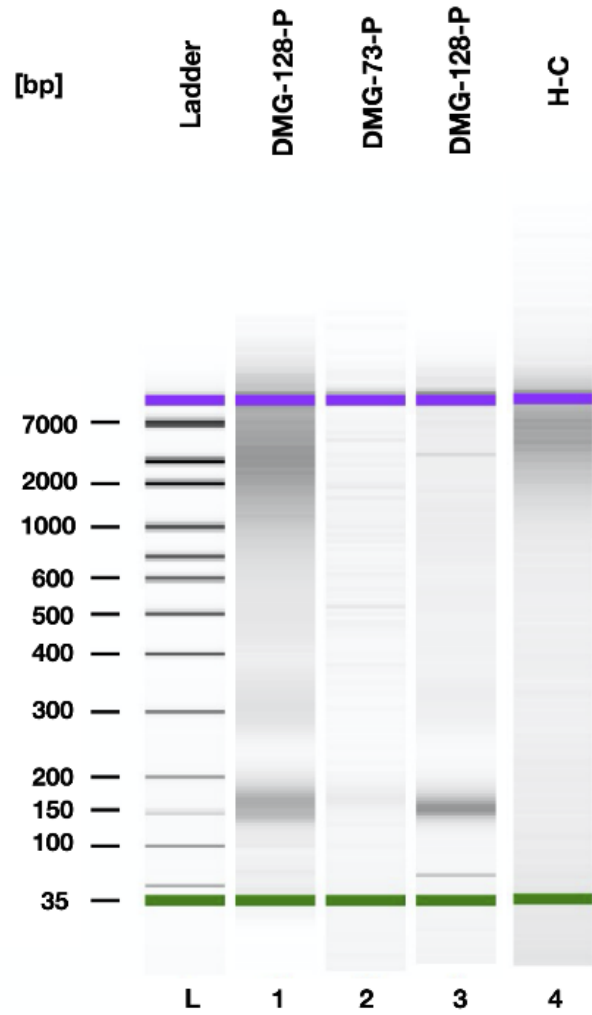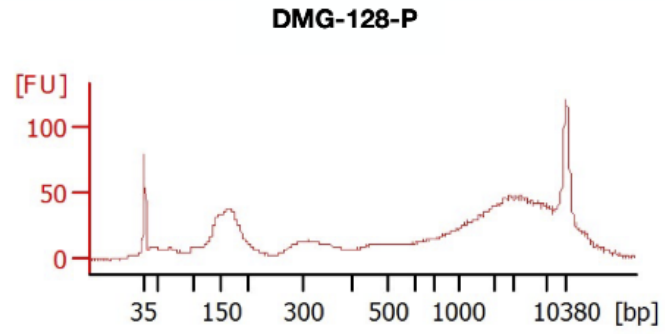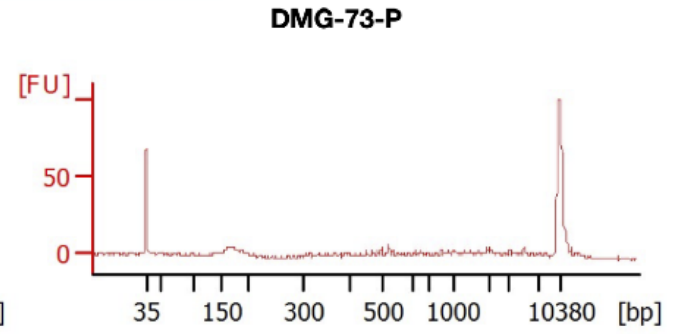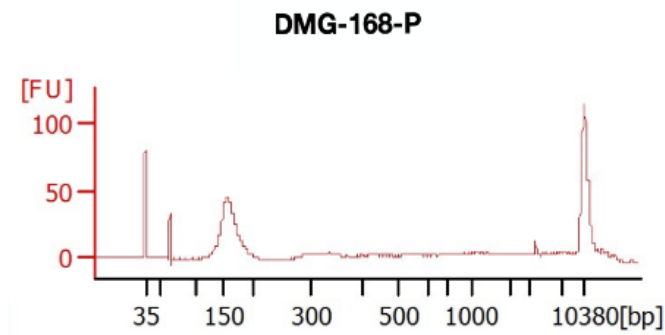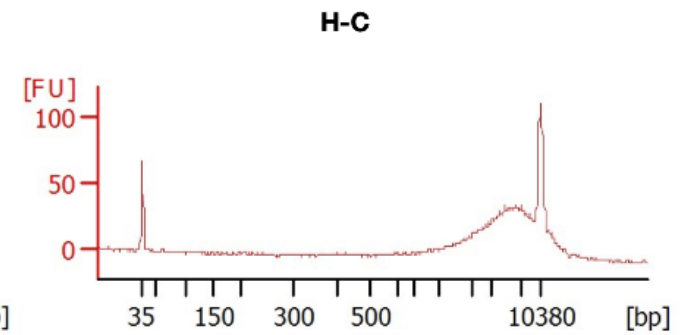

## SUPPLEMENTARY FIGURE 2

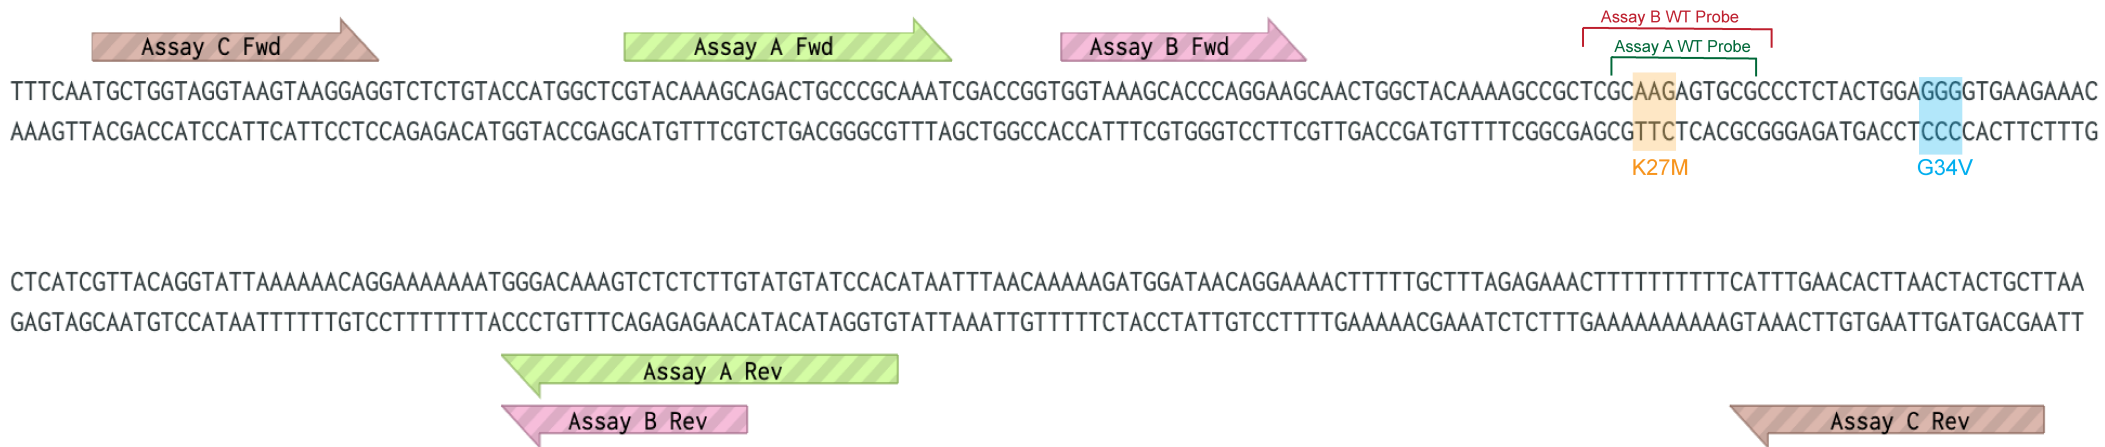

# SUPPLEMENTARY FIGURE 3

## A

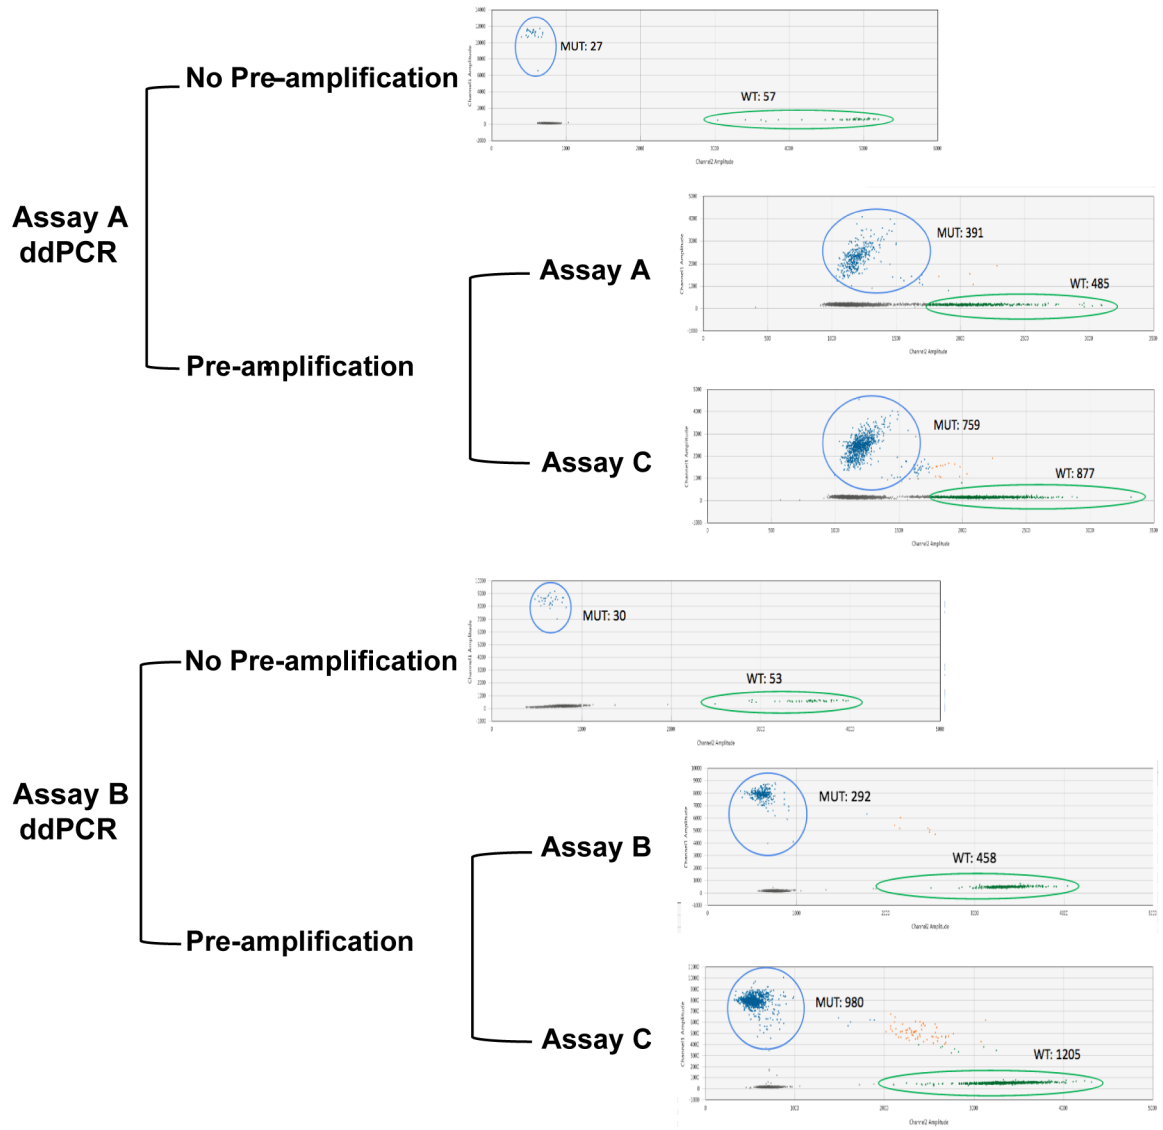

**B**

**No pre-amplification  
Assay A**

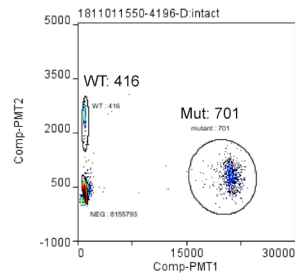

**Pre-amplification  
Assay A**

**ddPCR  
Assay A**

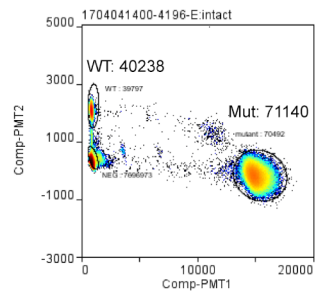

**ddPCR  
Assay B**

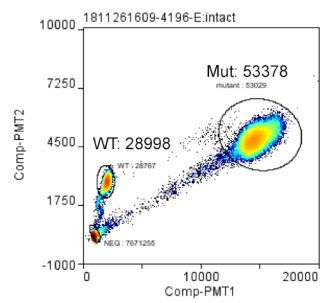

SUPPLEMENTARY FIGURE 4

A

KNS 42 (H3F3A WT)

SF7761 (H3K27M)

Assay A

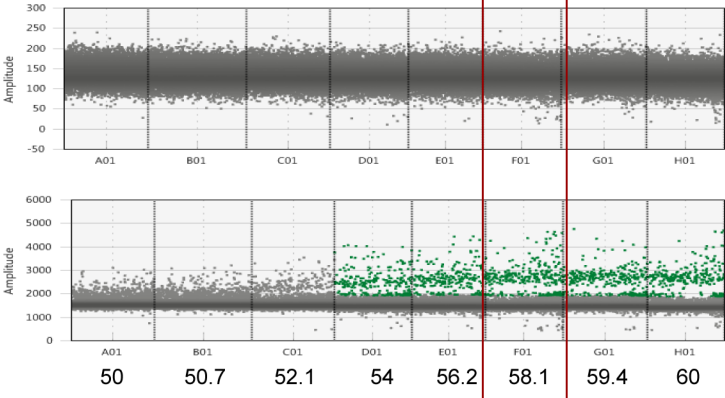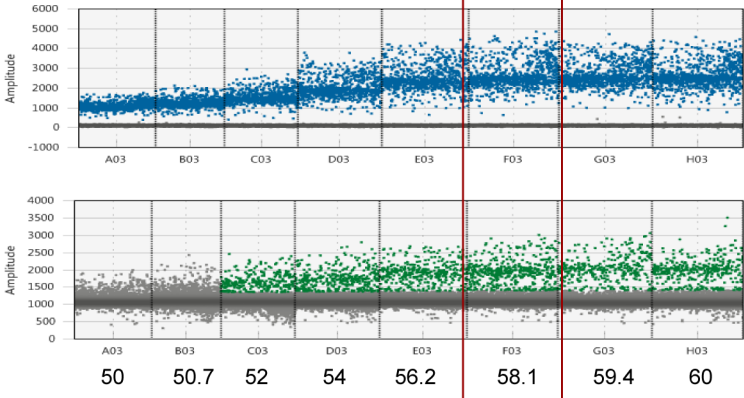

Temperature (°C):

Assay B

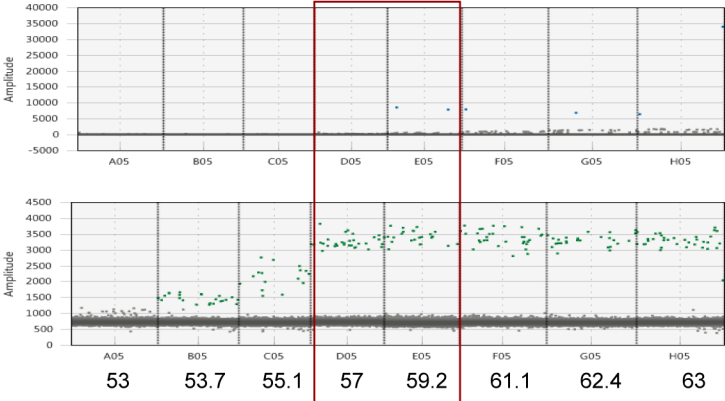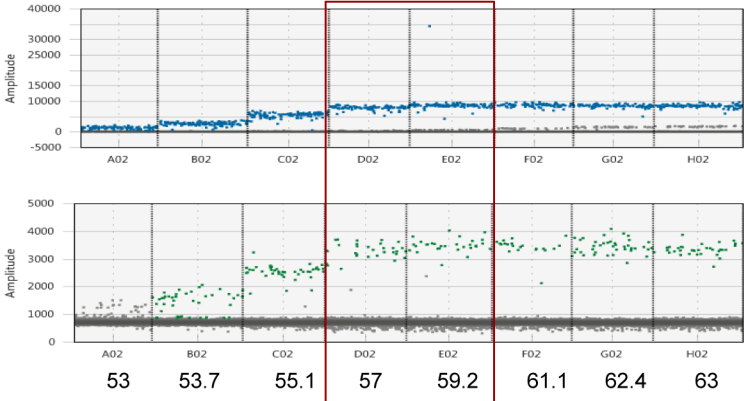

Temperature (°C):

**B****KNS 42 (H3F3A WT)****SF7761 (H3K27M)****Assay A**  
(40 cycles)+5  
cycles**Assay A**  
(45 cycles)+5  
cycles**Assay A**  
(50 cycles)**Assay B**  
(40 cycles)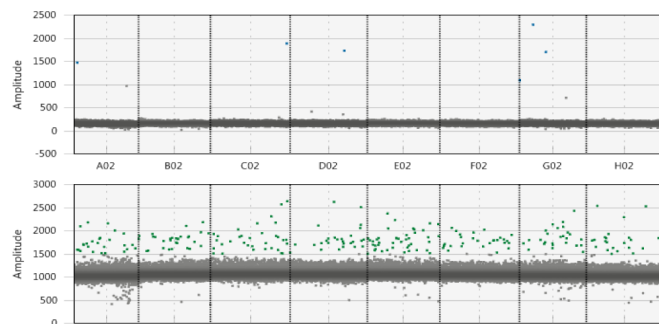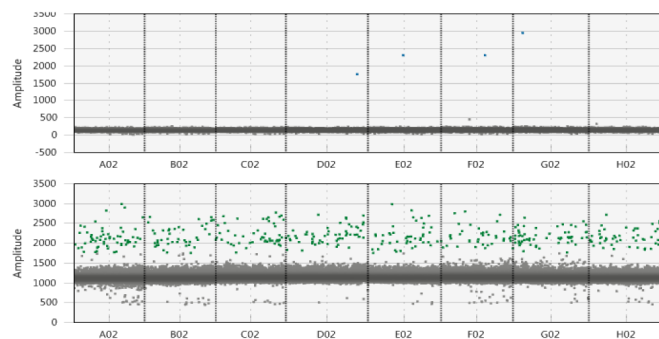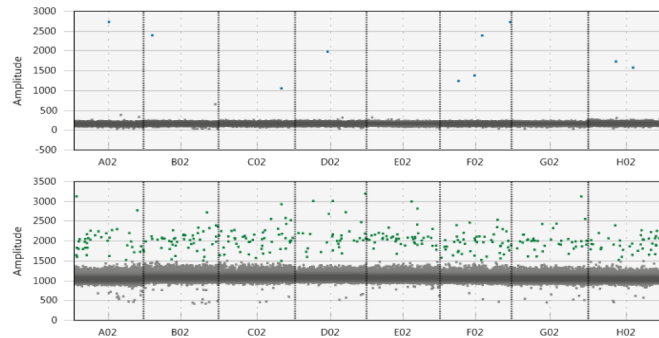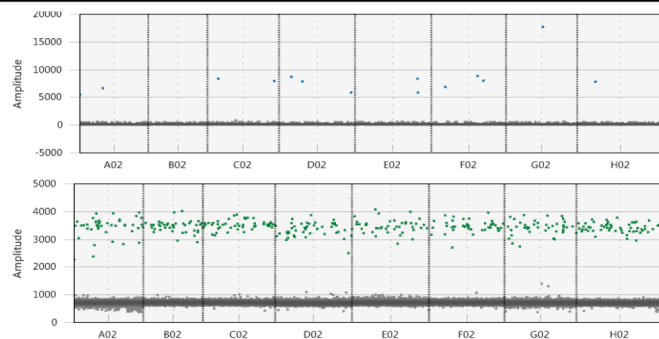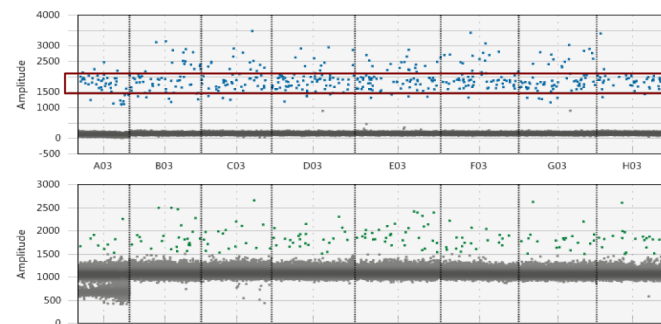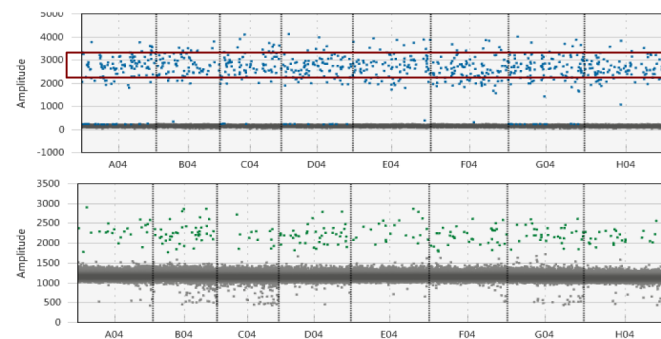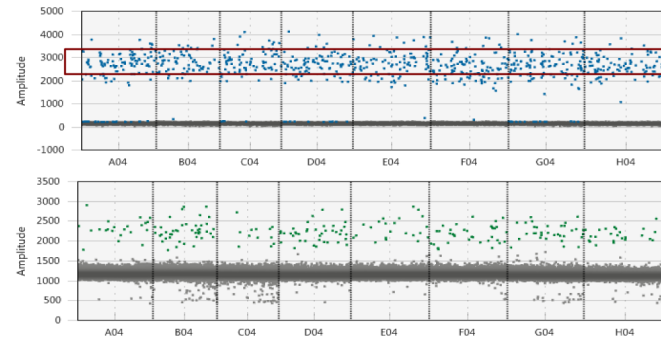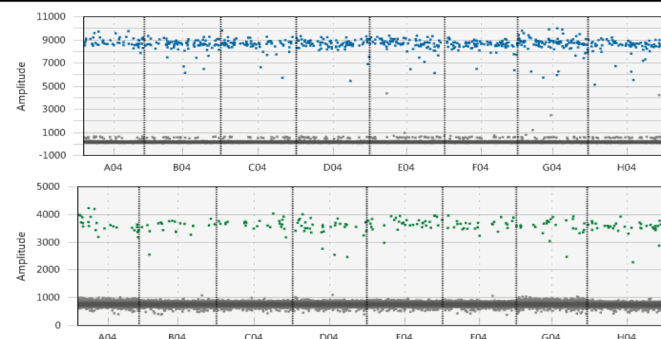

**SUPPLEMENTARY FIGURE 5**

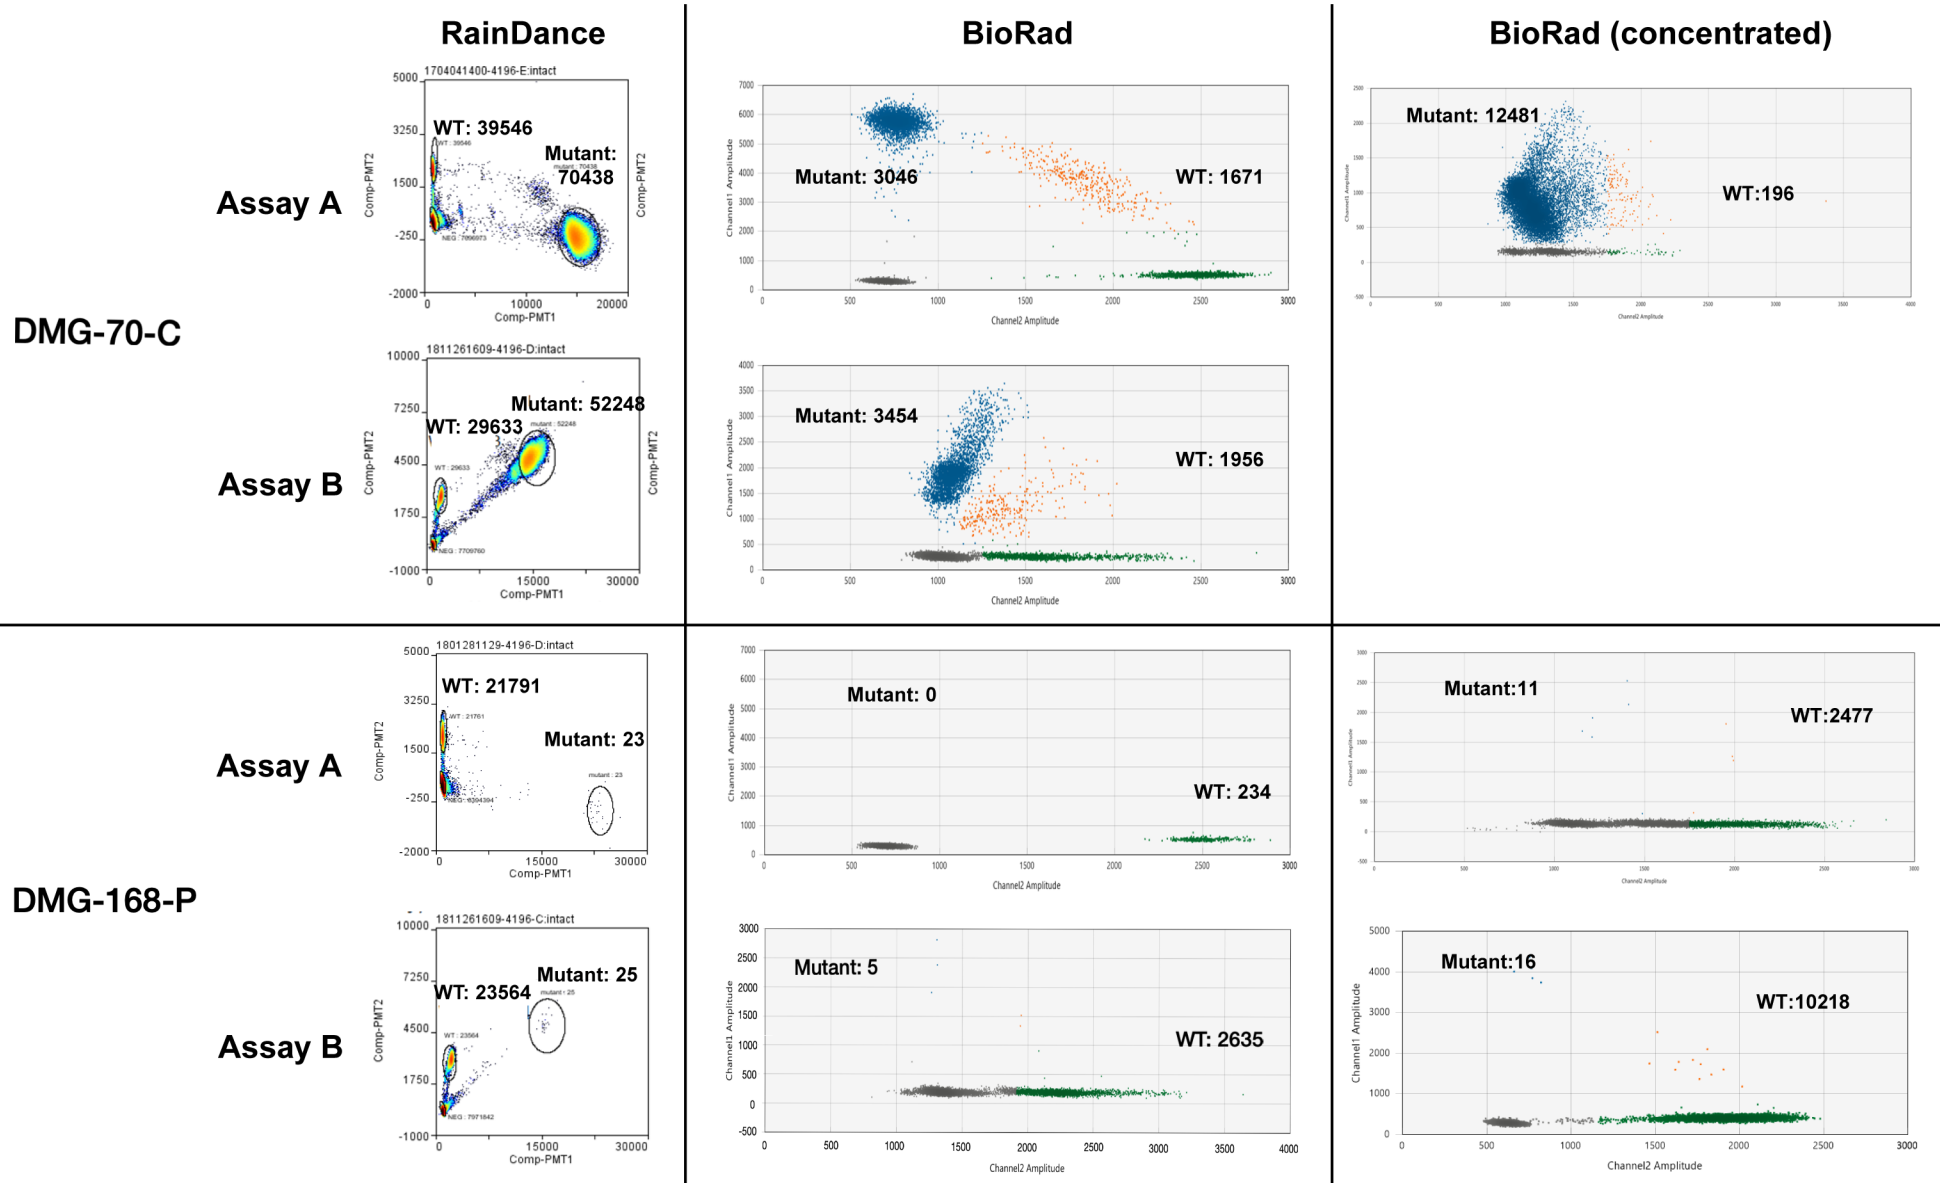



**A**

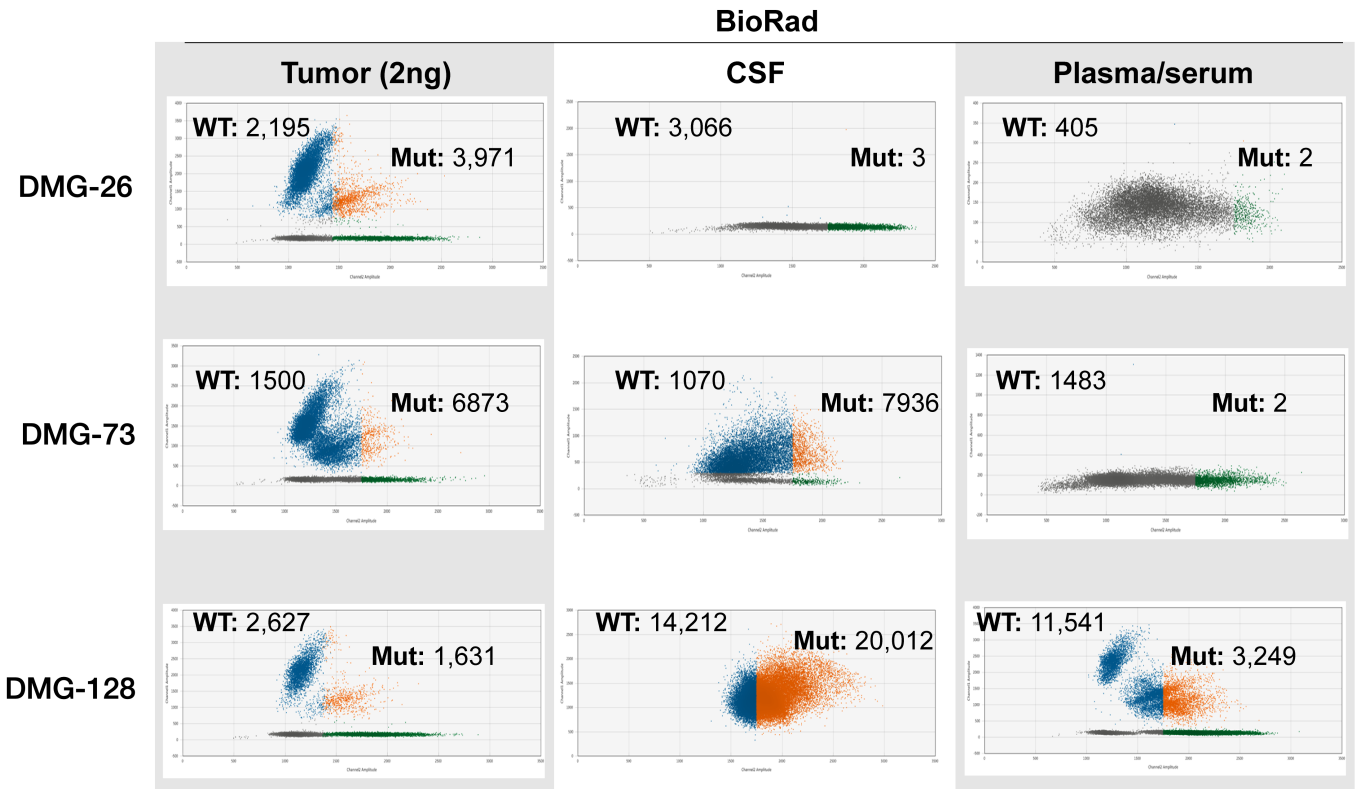

**B**

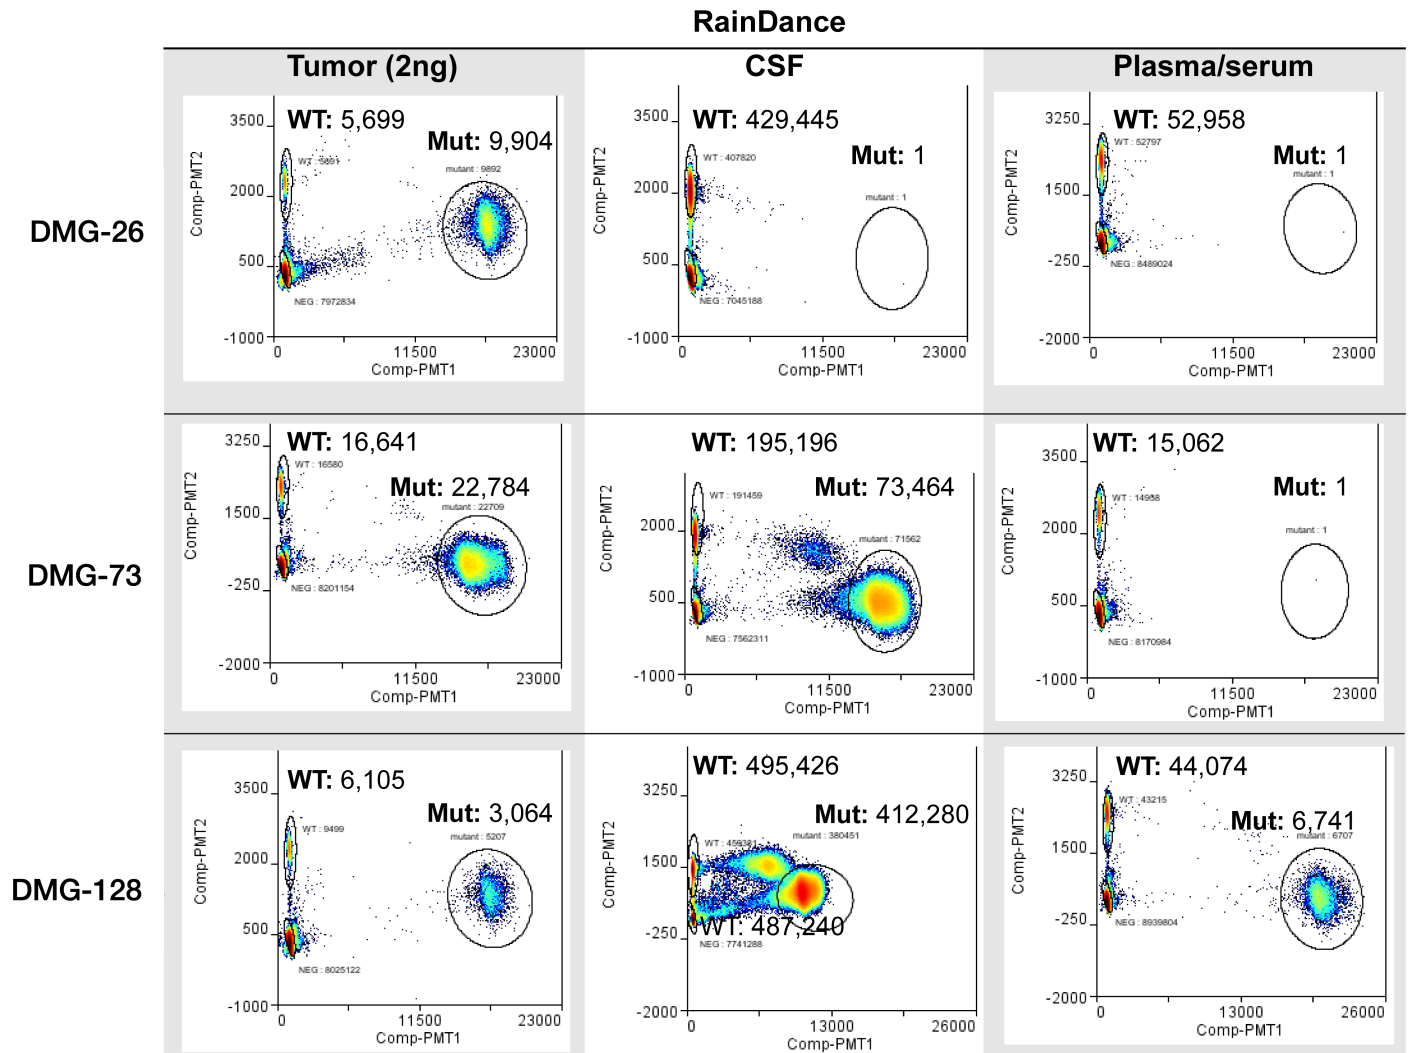

**Supplementary Table 1. Biological Specimens used.** All samples de-identified and labeled as follows in subsequent figures.

| <b>Sample</b>    | <b>Type</b> | <b>Time point of Collection</b> | <b>Diagnosis</b>   | <b>H3K27 status</b> |
|------------------|-------------|---------------------------------|--------------------|---------------------|
| <b>DMG-26</b>    | Tumor       | Postmortem                      | DMG                | H3.3K27M Mutant     |
|                  | CSF         | Postmortem                      |                    |                     |
|                  | Serum       | During treatment                |                    |                     |
| <b>DMG-73</b>    | Tumor       | Postmortem                      | DMG                | H3.3K27M Mutant     |
|                  | CSF         | Postmortem                      |                    |                     |
|                  | Plasma      | During treatment                |                    |                     |
| <b>DMG-128</b>   | Tumor       | Postmortem                      | DMG                | H3.3K27M Mutant     |
|                  | CSF         | Postmortem                      |                    |                     |
|                  | Plasma      | Postmortem                      |                    |                     |
| <b>DMG-51-T</b>  | Tumor       | Postmortem                      | DMG                | H3.3K27M Mutant     |
| <b>DMG-1-C</b>   | CSF         | During treatment                | DMG                | H3.3K27M Mutant     |
| <b>DMG-70-C</b>  | CSF         | During treatment                | DMG                | H3.3K27M Mutant     |
| <b>DMG-168-P</b> | Plasma      | During treatment                | DMG                | H3.3K27M Mutant     |
| <b>SF 7761</b>   | Cell line   | n/a                             | DMG                | H3.3K27M Mutant     |
| <b>KNS 42</b>    | Cell line   | n/a                             | Supratentorial GBM | Wild-Type           |
| <b>H-C</b>       | CSF         | During treatment                | Hydrocephalus      | Wild-Type           |

**Abbreviations:** CSF = cerebrospinal fluid, DMG = diffuse midline glioma, GBM = glioblastoma multiforme

**Supplementary Tables 2A-D. Cumulative ddPCR data generated through ddPCR analysis on BioRad Q200x and RainDance platforms. Abbreviations:** avg = average, C =

Cerebrospinal fluid, M = positive mutant droplet count, MAF = mutant-allelic frequency, P = plasma, P/A = pre-amplification, S = serum, stdev = standard deviation, T = tumor, V/C = vacuum concentration, WT = positive wildtype droplet count

**A:** Data generated for Figure 1A-C. ddPCR analysis of CSF ctDNA with and without pre-amplification

| Figure  | Specimen         | Assay            | Conditions       | BioRad           |        |         |                    | RainDance |            |         |                    |  |  |
|---------|------------------|------------------|------------------|------------------|--------|---------|--------------------|-----------|------------|---------|--------------------|--|--|
|         |                  |                  |                  | M                | WT     | MAF (%) | Avg MAF (%± stdev) | M         | WT         | MAF (%) | Avg MAF (%± stdev) |  |  |
| 1A      | Blank            | A                | No P/A           | 0                | 0      | 0       | 0±0                |           |            |         |                    |  |  |
|         |                  |                  |                  | 0                | 0      | 0       |                    |           |            |         |                    |  |  |
|         |                  |                  |                  | 0                | 0      | 0       |                    |           |            |         |                    |  |  |
|         | H-C              |                  |                  | No P/A           | 0      | 3       | 0                  | 0±0       |            |         |                    |  |  |
|         |                  |                  |                  |                  | 0      | 18      | 0                  |           |            |         |                    |  |  |
|         |                  |                  |                  |                  | 0      | 15      | 0                  |           |            |         |                    |  |  |
|         | DMG-1-C          |                  |                  |                  | No P/A | 29      | 55                 | 34.52     | 37.86±3.14 |         |                    |  |  |
|         |                  |                  |                  |                  |        | 29      | 42                 | 40.85     |            |         |                    |  |  |
|         |                  |                  |                  |                  |        | 36      | 55                 | 39.56     |            |         |                    |  |  |
|         |                  |                  | 27               |                  |        | 42      | 39.13              |           |            |         |                    |  |  |
|         |                  |                  | 30               |                  |        | 52      | 36.59              |           |            |         |                    |  |  |
|         |                  |                  | 27               |                  |        | 57      | 32.14              |           |            |         |                    |  |  |
|         |                  |                  | 40               | 59               |        | 40.40   |                    |           |            |         |                    |  |  |
|         | 29               |                  | 44               | 39.73            |        |         |                    |           |            |         |                    |  |  |
|         | Blank            |                  | P/A with assay A | 0                |        | 0       | 0                  | 0±0       |            |         |                    |  |  |
|         |                  |                  |                  | 0                | 0      | 0       |                    |           |            |         |                    |  |  |
|         |                  |                  |                  | 0                | 2      | 0       |                    |           |            |         |                    |  |  |
|         | H-C              |                  |                  | P/A with assay A | 0      | 167     | 0                  | 0±0       |            |         |                    |  |  |
|         |                  |                  |                  |                  | 0      | 188     | 0                  |           |            |         |                    |  |  |
|         |                  |                  |                  |                  | 0      | 183     | 0                  |           |            |         |                    |  |  |
|         |                  |                  |                  |                  | 0      | 176     | 0                  |           |            |         |                    |  |  |
| DMG-1-C | P/A with assay A | 373              |                  |                  | 464    | 44.56   | 44.85±1.69         |           |            |         |                    |  |  |
|         |                  | 358              |                  |                  | 434    | 45.20   |                    |           |            |         |                    |  |  |
|         |                  | 391              | 385              |                  | 44.63  |         |                    |           |            |         |                    |  |  |
|         |                  | 488              | 595              |                  | 45.06  |         |                    |           |            |         |                    |  |  |
|         |                  | 336              | 425              |                  | 44.15  |         |                    |           |            |         |                    |  |  |
|         |                  | 363              | 503              | 41.92            |        |         |                    |           |            |         |                    |  |  |
|         |                  | 393              | 476              | 45.22            |        |         |                    |           |            |         |                    |  |  |
| 451     |                  | 487              | 48.08            |                  |        |         |                    |           |            |         |                    |  |  |
| Blank   |                  | P/A with assay C | 0                | 0                | 0      | 0±0     |                    |           |            |         |                    |  |  |
|         | 0                |                  | 0                | 0                |        |         |                    |           |            |         |                    |  |  |
|         | 0                |                  | 2                | 0                |        |         |                    |           |            |         |                    |  |  |
| H-C     | P/A with assay C |                  | 0                | 246              | 0      | 0±0     |                    |           |            |         |                    |  |  |
|         |                  |                  | 0                | 264              | 0      |         |                    |           |            |         |                    |  |  |
|         |                  |                  | 0                | 223              | 0      |         |                    |           |            |         |                    |  |  |
|         |                  |                  | 0                | 228              | 0      |         |                    |           |            |         |                    |  |  |
| DMG-1-C |                  |                  | P/A with assay C | 852              | 1029   | 45.30   | 46.66±0.77         |           |            |         |                    |  |  |
|         |                  |                  |                  | 897              | 976    | 47.89   |                    |           |            |         |                    |  |  |
|         |                  | 781              |                  | 892              | 46.68  |         |                    |           |            |         |                    |  |  |
|         |                  | 893              |                  | 1015             | 46.80  |         |                    |           |            |         |                    |  |  |
|         |                  | 670              |                  | 746              | 47.32  |         |                    |           |            |         |                    |  |  |
|         | 874              | 1018             |                  | 46.19            |        |         |                    |           |            |         |                    |  |  |
|         | 857              | 979              |                  | 46.68            |        |         |                    |           |            |         |                    |  |  |
| 759     | 877              | 46.39            |                  |                  |        |         |                    |           |            |         |                    |  |  |
| 1B      | Blank            | B                |                  | No P/A           | 0      | 0       | 0                  | 0±0       |            |         |                    |  |  |
|         |                  |                  |                  | 0                | 0      | 0       |                    |           |            |         |                    |  |  |
|         |                  |                  |                  | 0                | 0      | 0       |                    |           |            |         |                    |  |  |

|    |          |   |                  |     |      |       |            |       |            |       |            |
|----|----------|---|------------------|-----|------|-------|------------|-------|------------|-------|------------|
|    |          |   |                  | 0   | 0    | 0     |            |       |            |       |            |
|    | H-C      |   |                  | 0   | 13   | 0     | 0±0        |       |            |       |            |
|    |          |   |                  | 0   | 19   | 0     |            |       |            |       |            |
|    |          |   |                  | 0   | 27   | 0     |            |       |            |       |            |
|    |          |   |                  | 0   | 20   | 0     |            |       |            |       |            |
|    |          |   |                  | 0   | 0    | 0     |            |       |            |       |            |
|    | DMG-1-C  |   |                  | 24  | 53   | 31.17 | 35.82±5.69 |       |            |       |            |
|    |          |   |                  | 19  | 49   | 27.94 |            |       |            |       |            |
|    |          |   |                  | 30  | 53   | 36.14 |            |       |            |       |            |
|    |          |   |                  | 27  | 40   | 40.30 |            |       |            |       |            |
|    |          |   |                  | 39  | 51   | 43.33 |            |       |            |       |            |
|    |          |   |                  | 35  | 50   | 41.18 |            |       |            |       |            |
|    |          |   |                  | 32  | 55   | 36.78 |            |       |            |       |            |
|    |          |   |                  | 36  | 85   | 29.75 |            |       |            |       |            |
|    | Blank    |   |                  | 0   | 1    | 0     | 0±0        |       |            |       |            |
|    |          |   |                  | 0   | 0    | 0     |            |       |            |       |            |
|    |          |   |                  | 0   | 0    | 0     |            |       |            |       |            |
|    |          |   |                  | 0   | 0    | 0     |            |       |            |       |            |
|    | H-C      |   |                  | 2   | 146  | 1.35  | 0.70±0.68  |       |            |       |            |
|    |          |   |                  | 0   | 150  | 0     |            |       |            |       |            |
|    |          |   |                  | 1   | 135  | 0.74  |            |       |            |       |            |
|    | DMG-1-C  |   | P/A with assay B | 346 | 512  | 40.33 | 39.08±0.95 |       |            |       |            |
|    |          |   |                  | 292 | 458  | 38.93 |            |       |            |       |            |
|    |          |   |                  | 397 | 633  | 38.54 |            |       |            |       |            |
|    |          |   |                  | 359 | 543  | 39.80 |            |       |            |       |            |
|    |          |   |                  | 366 | 568  | 39.19 |            |       |            |       |            |
|    |          |   |                  | 312 | 522  | 37.41 |            |       |            |       |            |
|    |          |   |                  | 316 | 475  | 39.95 |            |       |            |       |            |
|    |          |   |                  | 343 | 549  | 38.45 |            |       |            |       |            |
|    | Blank    |   |                  | 0   | 0    | 0     | 0±0        |       |            |       |            |
|    |          |   |                  | 0   | 0    | 0     |            |       |            |       |            |
|    |          |   |                  | 0   | 0    | 0     |            |       |            |       |            |
|    |          |   |                  | 0   | 0    | 0     |            |       |            |       |            |
|    | H-C      |   |                  | 0   | 111  | 0     | 0.25±0.49  |       |            |       |            |
|    |          |   |                  | 0   | 95   | 0     |            |       |            |       |            |
|    |          |   |                  | 0   | 104  | 0     |            |       |            |       |            |
|    |          |   |                  | 1   | 101  | 0     |            |       |            |       |            |
|    | DMG-1-C  |   | P/A with assay C | 818 | 1021 | 44.48 | 44.29±2.03 |       |            |       |            |
|    |          |   |                  | 799 | 1069 | 42.77 |            |       |            |       |            |
|    |          |   |                  | 884 | 1080 | 45.01 |            |       |            |       |            |
|    |          |   |                  | 980 | 1025 | 48.88 |            |       |            |       |            |
|    |          |   |                  | 825 | 1115 | 42.53 |            |       |            |       |            |
|    |          |   |                  | 778 | 1013 | 43.44 |            |       |            |       |            |
|    |          |   |                  | 906 | 1152 | 44.02 |            |       |            |       |            |
|    |          |   |                  | 942 | 1238 | 43.21 |            |       |            |       |            |
| 1C | DMG-70-C | A | No P/A           |     |      |       |            | 701   | 416        | 62.76 | 61.73±1.73 |
|    |          |   |                  |     |      |       |            | 577   | 389        | 59.73 |            |
|    |          |   |                  |     |      |       |            | 528   | 314        | 62.71 |            |
|    |          | A | P/A with assay A |     |      |       |            | 70438 | 39546      | 64.04 | 64.44±0.56 |
|    |          |   |                  |     |      |       |            | 69026 | 37542      | 64.83 |            |
|    |          | B | P/A with assay A |     |      |       |            | 52589 | 29866      | 63.78 |            |
|    |          |   |                  |     |      | 52573 | 29095      | 64.37 | 64.17±0.34 |       |            |
|    |          |   |                  |     |      | 65434 | 36228      | 64.36 |            |       |            |

**B:** Data generated for Figure 2A and B. Optimization of ctDNA detection across technical platforms and institutions

| Figure | Specimen | Assay | Conditions | BioRad |    |         |                    | RainDance |       |         |                    |
|--------|----------|-------|------------|--------|----|---------|--------------------|-----------|-------|---------|--------------------|
|        |          |       |            | M      | WT | MAF (%) | Avg MAF (%± stdev) | M         | WT    | MAF (%) | Avg MAF (%± stdev) |
| 2A     | DMG-70-C | A     | P/A, 12uL  |        |    |         |                    | 70438     | 39546 | 64.04   | 64.44±0.56         |

|           |               |   |                     |              |                      |                      |                           |                         |                         |                         |            |
|-----------|---------------|---|---------------------|--------------|----------------------|----------------------|---------------------------|-------------------------|-------------------------|-------------------------|------------|
|           |               |   |                     |              |                      |                      |                           | 69026                   | 37542                   | 64.83                   |            |
|           |               | B | P/A, 12uL           |              |                      |                      |                           | 52589<br>52573<br>65434 | 29866<br>29095<br>36228 | 63.78<br>64.37<br>64.36 | 64.17±0.34 |
|           |               | A | P/A, 1uL,<br>no V/C | 3046<br>3101 | 1671<br>1701         | 64.57<br>64.58       | 64.58±1.64E <sup>-5</sup> |                         |                         |                         |            |
|           |               | B | P/A, 1uL,<br>no V/C | 3454<br>2844 | 1956<br>1630         | 63.84<br>63.57       | 63.70±0.19                |                         |                         |                         |            |
| <b>2B</b> | DMG-168-<br>P | A | P/A, 12uL           |              |                      |                      |                           | 23<br>24<br>20          | 21791<br>23166<br>21477 | 0.11<br>0.10<br>0.09    | 0.10±0.01  |
|           |               |   | P/A, 1uL,<br>no V/C | 1<br>13<br>5 | 1220<br>2931<br>2635 | 0.08<br>0.44<br>0.19 | 0.24±0.18                 |                         |                         |                         |            |
|           |               |   | P/A, 1uL,<br>V/C    | 10<br>11     | 2477<br>1362         | 0.40<br>0.80         | 0.60±0.28                 |                         |                         |                         |            |
|           |               | B | P/A, 12uL           |              |                      |                      |                           | 29<br>18<br>25          | 30637<br>22040<br>23598 | 0.095<br>0.082<br>0.106 | 0.09±0.01  |
|           |               |   | P/A, 1uL,<br>no V/C | 0<br>0       | 254<br>268           | 0<br>0               | 0±0                       |                         |                         |                         |            |
|           |               |   | P/A, 1uL,<br>V/C    | 16<br>13     | 10218<br>10448       | 0.16<br>0.12         | 0.14±0.03                 |                         |                         |                         |            |

**C:** Data generated for Figure 3. H3.3K27M mutant DNA is detectable in patient-matched tumor tissue, CSF and plasma or serum specimens. All specimens were pre-amplified and analyzed using Assay A primers and/or probes.

| Specimen | T/C/S/P | BioRad (V/C)         |                        |                         |                    | RainDance            |                         |                         |                    |
|----------|---------|----------------------|------------------------|-------------------------|--------------------|----------------------|-------------------------|-------------------------|--------------------|
|          |         | M                    | WT                     | MAF (%)                 | Avg MAF (%± stdev) | M                    | WT                      | MAF (%)                 | Avg MAF (%± stdev) |
| DMG-26   | T       | 3255<br>3843<br>3971 | 1618<br>1999<br>2195   | 66.80<br>65.78<br>64.40 | 65.66±1.20         | 9709<br>9904         | 5668<br>5699            | 63.14<br>63.47          | 63.31±2.37         |
|          | C       | 2<br>3               | 1215<br>3066           | 0.16<br>0.10            | 0.13±0.05          | 1<br>0               | 418466<br>429445        | 0.0002<br>0             | 0.0001±0           |
|          | S       | 0<br>0               | 405<br>14              | 0<br>0                  | 0±0                | 0<br>1<br>0          | 51230<br>52958<br>50727 | 0<br>0.002<br>0         | 0.0006±0           |
| DMG-73   | T       | 6231<br>6873         | 937<br>1500            | 86.93<br>82.09          | 84.51±3.42         | 19724<br>22784       | 14351<br>16641          | 57.88<br>57.80          | 57.84±0.07         |
|          | C       | 4844<br>7936         | 344<br>1070            | 93.37<br>88.12          | 90.74±3.71         | 72042<br>73464       | 190741<br>195196        | 27.42<br>27.35          | 27.38±0.05         |
|          | P       | 0<br>2<br>0          | 518<br>1483<br>225     | 0<br>0.13<br>0          | 0.04±0.08          | 0<br>1<br>1          | 14683<br>14971<br>15062 | 0<br>0.007<br>0.007     | 0.004±0.004        |
| DMG-128  | T       | 1340<br>1437<br>1631 | 2242<br>2317<br>2627   | 37.41<br>38.28<br>38.30 | 38.00±0.51         | 3064<br>3046         | 6105<br>5554            | 33.42<br>35.42          | 34.42±1.42         |
|          | C       | 20012<br>18686       | 13094<br>14212         | 60.45<br>56.80          | 58.62±2.58         | 412280<br>396924     | 495426<br>479054        | 45.42<br>45.31          | 45.37±0.08         |
|          | P       | 2868<br>3159<br>3249 | 10213<br>9900<br>11541 | 21.92<br>24.19<br>21.97 | 22.69±1.30         | 6317<br>6741<br>6718 | 41542<br>43350<br>44074 | 13.20<br>13.46<br>13.23 | 13.29±0.14         |

**D:** Data generated for Figure 4A and B. ddPCR results are consistent across institutions, irrespective of specimen preparation location. All specimens were pre-amplified with Assay C primers.

| Figure | Specimen | Assay | BioRad |     |         |                    | RainDance |      |         |                    |
|--------|----------|-------|--------|-----|---------|--------------------|-----------|------|---------|--------------------|
|        |          |       | M      | WT  | MAF (%) | Avg MAF (%± stdev) | M         | WT   | MAF (%) | Avg MAF (%± stdev) |
| 4A     | SF7761   | A     | 465    | 142 | 76.61   | 77.45±1.92         | 942       | 298  | 75.97   | 75.00±1.38         |
|        |          |       | 542    | 134 | 80.18   |                    | 852       | 299  | 74.02   |                    |
|        |          |       |        | 562 | 180     | 75.74              |           |      |         |                    |
|        |          |       | 820    | 241 | 77.29   |                    |           |      |         |                    |
|        |          | B     | 134    | 21  | 86.45   | 83.90±3.60         | 933       | 299  | 75.73   | 75.73±0            |
|        |          |       | 144    | 33  | 81.36   |                    |           |      |         |                    |
| 4B     | DMG-1-C  | A     | 335    | 415 | 44.67   | 43.62±0.98         | 1142      | 1708 | 40.07   | 41.17±1.55         |
|        |          |       | 377    | 496 | 43.18   |                    | 986       | 1347 | 42.26   |                    |
|        |          |       |        | 381 | 482     | 44.15              |           |      |         |                    |
|        |          |       | 409    | 554 | 42.47   |                    |           |      |         |                    |
|        |          | B     | 176    | 204 | 46.32   | 45.02±1.83         | 1013      | 1389 | 42.17   | 41.05±0.97         |
|        |          |       | 171    | 220 | 43.73   |                    | 1046      | 1540 | 40.45   |                    |
|        |          |       |        |     |         |                    | 961       | 1410 | 40.53   |                    |
